# Supplementary material for: High Serum Levels of Toxin A Correlate with Disease Severity in Patients with Clostridioides difficile Infection
Source: MDPI journal article supplement (doi:10.3390/antibiotics10091093), 2021-09-10
Supplement: s1 [file s1]

## Supplementary Materials

# High Serum Levels of Toxin A Correlate with Disease Severity in Patients with *Clostridioides difficile* Infection

Guido Granata <sup>1,†</sup>, Davide Mariotti <sup>1,2,†</sup>, Paolo Ascenzi <sup>2,3</sup>, Nicola Petrosillo <sup>1,‡</sup> and Alessandra di Masi <sup>2,\*‡</sup>

<sup>1</sup> Clinical and Research Department for Infectious Diseases, National Institute for Infectious Diseases L. Spallanzani, IRCCS, 00149, Italy; guido.granata@inmi.it (G.G.); davide.mariotti16@gmail.com (D.M.); nicola.petrosillo@inmi.it (N.P.)

<sup>2</sup> Department of Science, Section of Biomedical Sciences and Technologies, Roma Tre University, 00146 Rome, Italy; paolo.ascenzi@uniroma3.it

<sup>3</sup> Accademia Nazionale dei Lincei, 00165, Rome, Italy

\* Correspondence: alessandra.dimasi@uniroma3.it; Tel.: +39-06-57336363

† These authors contributes equally to this work.

‡ Co-last Authors.

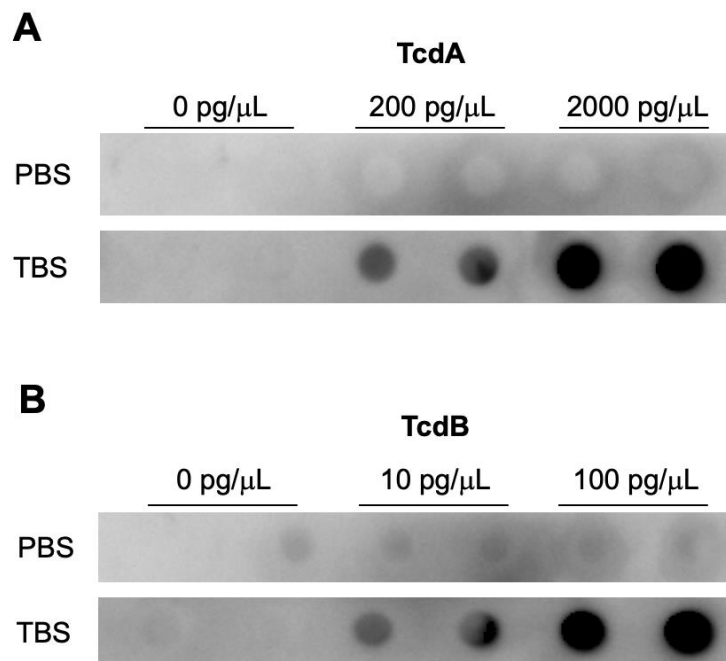

**Figure S1. *C. difficile* toxins resuspension in either PBS or TBS is critical for dot-blot sensitivity.** Representative images of dot-blot experiment using the commercial (A) TcdA and (B) TcdB toxins resuspended in either PBS or TBS. The resuspension in TBS allowed the solubilization of the serum lipid and consequently a higher sensitivity of the technique. Each toxin concentration was spotted on PVDF membrane in duplicate. Signals were revealed using specific anti-TcdA or anti-TcdB antibodies.

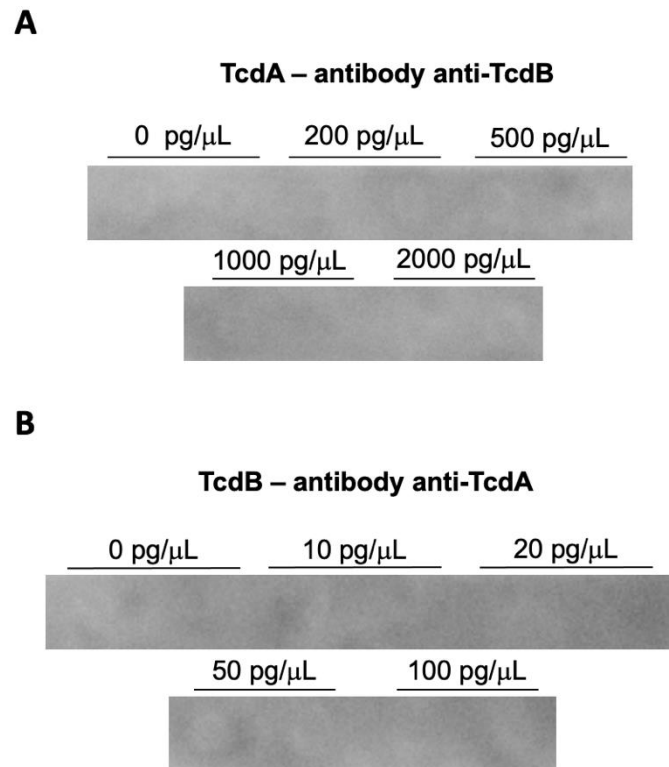

**Figure S2. Cross-reactivity experiments to evaluate the specificity of the dot-blot assay.** (A) The indicated concentrations of the commercial TcdA were spotted in duplicate and the PVDF filter was blotted using the anti-TcdB specific antibody. (B) The indicated concentrations of the commercial TcdB were spotted in duplicate and the PVDF filter was blotted using the anti-TcdA specific antibody.

**Table S1.** Demographic and epidemiological data, comorbidities, clinical characteristics, and outcome of the 35 CDI cases included in the study. CCI: Charlson Comorbidity Index; rCDI: recurrent CDI; COPD: chronic obstructive pulmonary disease. SD: standard deviation.

| Characteristics                                 | Mean $\pm$ SD (%) |
|-------------------------------------------------|-------------------|
| Female gender                                   | 18 (51.4%)        |
| Age (years)                                     | 60 (range: 19-86) |
| First CDI episode                               | 30 (85.7%)        |
| Recurrence of CDI                               | 5 (14.3%)         |
| No comorbidities                                | 10 (28.6%)        |
| Comorbidities                                   | 25 (71.4%)        |
| Cardiovascular disease                          | 13 (37.1%)        |
| Heart failure                                   | 4 (11.4%)         |
| Diabetes                                        | 7 (20.0%)         |
| Renal failure                                   | 3 (8.6%)          |
| Dialysis                                        | 0                 |
| Chronic liver failure                           | 2 (5.7%)          |
| Neurological disease                            | 4 (11.4%)         |
| Vasculitis                                      | 2 (5.7%)          |
| COPD                                            | 9 (25.7%)         |
| Solid cancer                                    | 3 (8.6%)          |
| Blood cancer                                    | 3 (8.6%)          |
| Transplant, immunodeficiency, immunosuppression | 7 (20.0%)         |
| Chronic inflammatory bowel disease              | 2 (5.7%)          |
| Other concomitant infections                    | 13 (37.1%)        |
| Mean age-adjusted CCI at admission              | 3.6 (range: 0-8)  |
| Antibiotic in the previous two months           | 32 (91.4%)        |
| Antiacids in the previous two months            | 27 (77.1%)        |
| Statins in the previous two months              | 4 (11.4%)         |
| Steroids in the previous two months             | 13 (37.1%)        |
| CDI severity                                    |                   |
| Mild-moderate                                   | 17 (48.6%)        |
| Severe                                          | 18 (51.4%)        |
| Patients outcome                                |                   |
| Deceased before the discharge                   | 1 (2.9%)          |
| Recovered at home, no subsequent rCDI           | 28 (82.4%)        |
| Subsequent rCDI                                 | 5 (14.7%)         |
| Deceased, rCDI-related                          | 0                 |
| Deceased, no rCDI-related                       | 1 (2.9%)          |

**Table S2.** Definitions of CDI, microbiological evidence of CDI, CDI recurrence, mild CDI and severe CDI adopted in the study.

---

**CDI:** A clinical picture characterized by diarrhea or ileum or toxic megacolon in the presence of microbiological evidence of CDI.

---

**Microbiological evidence of CDI:**

- GDH positive antigen + A/B positive toxins (enzyme immunoassay).
- GDH positive antigen, A/B negative toxins (immunoenzymatic method) + positivity of the amplification of the genes that encode *C. difficile* toxins.
- Positivity of the amplification of the genes that encode *C. difficile* toxins + A/B positive toxins by enzyme immunoassay.

**Recurrence of CDI:** The onset of a new episode of CDI after at least two days from the resolution of the diarrhea and after the end of the antimicrobial treatment of the previous CDI episode.

**Mild CDI:** CDI in the absence of the following criteria: fever ( $> 38.5^{\circ}$ ), chills, hemodynamic instability, signs of ileus or peritonitis, leukocytosis (leukocytes  $>15,000$  cells/ $\mu$ l) creatininemia increase  $>1.5$  times the values before the infection, increase in serum lactates, histological evidence of pseudo-membranous colitis, radiological evidence of ileus or ascites.

**Severe CDI:** CDI in the presence of at least one of the following criteria: fever ( $> 38.5^{\circ}$ ), chills, hemodynamic instability, signs of ileus or peritonitis, leukocytosis (leukocytes  $>15,000$  cells/ $\mu$ l) creatininemia increase  $>1.5$  times the values before the infection, increase in serum lactates, histological evidence of pseudo-membranous colitis, radiological evidence of ileus or ascites.

---

**Table S3.** TcdA and TcdB plasma levels and presence of the binary toxin *tcdC* gene in the CDI strains found in the 35 patients enrolled in the study. PCR: polymerase chain reaction.

| # Patient | T0                 |                    | T4                 |                    | T10                |                    | Presence of the binary toxin <i>tcdC</i> gene by PCR | Infection Severity |
|-----------|--------------------|--------------------|--------------------|--------------------|--------------------|--------------------|------------------------------------------------------|--------------------|
|           | TcdA (pg/ $\mu$ L) | TcdB (pg/ $\mu$ L) | TcdA (pg/ $\mu$ L) | TcdB (pg/ $\mu$ L) | TcdA (pg/ $\mu$ L) | TcdB (pg/ $\mu$ L) |                                                      |                    |
| 001       | 79,8 $\pm$ 5,8     | 0,0                | 24,6 $\pm$ 5       | 0,0                | 14 $\pm$ 0,8       | 0,0                | n/a                                                  | Mild               |
| 002       | 0,0                | 51,2 $\pm$ 0,6     | 0,0                | 49,6 $\pm$ 1,2     | 0,0                | 45,2 $\pm$ 6       | n/a                                                  | Mild               |
| 003       | 112,4 $\pm$ 14,6   | 44 $\pm$ 1,6       | 0,0                | 22 $\pm$ 0,2       | 7,4 $\pm$ 1,6      | 19 $\pm$ 2,2       | Negative                                             | Mild               |
| 004       | 214,8 $\pm$ 4      | 137,4 $\pm$ 1      | 139,6 $\pm$ 3,2    | 120 $\pm$ 0,8      | 0,0                | 77,4 $\pm$ 4,8     | n/a                                                  | Severe             |
| 005       | 126 $\pm$ 10       | 0,0                | 234 $\pm$ 3,8      | 0,0                | 231,4 $\pm$ 68,6   | 0,0                | n/a                                                  | Severe             |
| 006       | 258,8 $\pm$ 4,8    | 0,0                | 265 $\pm$ 36       | 0,0                | 227,8 $\pm$ 1,2    | 0,0                | n/a                                                  | Severe             |
| 007       | 243 $\pm$ 7        | 0,0                | 239 $\pm$ 1        | 0,0                | 217 $\pm$ 30       | 0,0                | Positive                                             | Mild               |
| 008       | 256,8 $\pm$ 53,6   | 0,0                | 175,2 $\pm$ 4,8    | 0,0                | 192,4 $\pm$ 3      | 0,0                | n/a                                                  | Mild               |
| 009       | 300 $\pm$ 82       | 0,0                | 178,6 $\pm$ 12,4   | 0,0                | n/a                | n/a                | n/a                                                  | Mild               |
| 010       | 257 $\pm$ 34       | 0,0                | 69 $\pm$ 10,4      | 0,0                | 17,4 $\pm$ 0,6     | 0,0                | Negative                                             | Mild               |
| 011       | 220 $\pm$ 30       | 0,0                | 104 $\pm$ 10       | 0,0                | 32,6 $\pm$ 6       | 0,0                | n/a                                                  | Mild               |
| 012       | 18,6 $\pm$ 26      | 0,0                | 52,8 $\pm$ 38      | 0,0                | 54 $\pm$ 18        | 0,0                | Negative                                             | Severe             |
| 013       | 38,4 $\pm$ 20      | 0,0                | 30,4 $\pm$ 22      | 0,0                | 16,4 $\pm$ 10      | 0,0                | n/a                                                  | Mild               |
| 014       | 28,6 $\pm$ 16      | 0,0                | 0,0                | 0,0                | 0,0                | 0,0                | Negative                                             | Severe             |
| 015       | 25,4 $\pm$ 0,8     | 0,0                | 17,6 $\pm$ 12      | 0,0                | 0,0                | 0,0                | Positive                                             | Severe             |
| 016       | 70,8 $\pm$ 26      | 0,0                | 58,4 $\pm$ 42      | 0,0                | 15,6 $\pm$ 0,06    | 0,0                | n/a                                                  | Mild               |
| 017       | 117,8 $\pm$ 54     | 0,0                | 85,8 $\pm$ 29      | 0,0                | 38,8 $\pm$ 30      | 0,0                | n/a                                                  | Severe             |
| 018       | 70,8 $\pm$ 2,2     | 0,0                | 11,6 $\pm$ 8       | 0,0                | 0,0                | 0,0                | Negative                                             | Severe             |

|     |             |         |              |          |             |            |          |        |
|-----|-------------|---------|--------------|----------|-------------|------------|----------|--------|
| 019 | 137,2 ± 22  | 0,0     | 192,2 ± 4,8  | 0,0      | 23,2 ± 16   | 0,0        | n/a      | Severe |
| 020 | 28,8 ± 7    | 0,0     | 98,6 ± 24,6  | 0,0      | 22 ± 14     | 0,0        | Positive | Severe |
| 021 | 0,0         | 0,0     | 34 ± 2,6     | 0,0      | 21,6 ± 7,4  | 0,0        | Positive | Mild   |
| 022 | 0,0         | 0,0     | 0,0          | 0,0      | 0,0         | 0,0        | n/a      | Mild   |
| 023 | 20 ± 14     | 0,0     | 57,8 ± 19,2  | 0,0      | 28,6 ± 20   | 0,0        | n/a      | Severe |
| 024 | 0,0         | 0,0     | 0,0          | 0,0      | 0,0         | 0,0        | Positive | Mild   |
| 025 | n/a         | n/a     | 25,8 ± 0,4   | 0,0      | 0,0         | 0,0        | n/a      | Mild   |
| 026 | 0,0         | 4 ± 0,4 | 55,6 ± 16    | 12 ± 7,2 | 84,6 ± 15   | 90,6 ± 3,8 | n/a      | Severe |
| 027 | 0,0         | 0,0     | 65,6 ± 30    | 0,0      | 58,4 ± 5,2  | 0,0        | n/a      | Severe |
| 028 | 26,8 ± 10,8 | 0,0     | 78,4 ± 26    | 0,0      | 78 ± 17     | 0,0        | Positive | Severe |
| 029 | 0,0         | 0,0     | 30 ± 2,6     | 0,0      | n/a         | n/a        | Positive | Mild   |
| 030 | 113,4 ± 5,4 | 0,0     | 122,4 ± 11,4 | 0,0      | 17,8 ± 12   | 0,0        | Negative | Mild   |
| 031 | 40,2 ± 15,6 | 0,0     | 109 ± 12,4   | 0,0      | 66,8 ± 12,2 | 0,0        | n/a      | Mild   |
| 032 | 10,8 ± 4,4  | 0,0     | 38,8 ± 15,2  | 0,0      | 33 ± 0,6    | 0,0        | Negative | Severe |
| 033 | 0,0         | 0,0     | n/a          | n/a      | n/a         | n/a        | Positive | Mild   |
| 034 | 196,6 ± 10  | 0,0     | 150 ± 22     | 0,0      | n/a         | n/a        | n/a      | Severe |
| 035 | 124,6 ± 13  | 0,0     | 103,8 ± 23,8 | 0,0      | n/a         | n/a        | n/a      | Mild   |

**Table S4.** Risk factors for high level of TcdA toxemia (TcdA > 60 pg/ L) at the CDI onset. RR: risk ratio. CI: confidence interval. SD: standard deviation. CCI: Charlson Co-morbidity Index.

|                                                                  | TcdA ≤ 60 pg/ L<br>at T0 (N = 17) | TcdA > 60 pg/ L<br>at T0 (N = 17) | RR (95% CI)   | Fisher's test* |
|------------------------------------------------------------------|-----------------------------------|-----------------------------------|---------------|----------------|
| Female gender                                                    | 8 (47.0%)                         | 9 (52.9%)                         | 1.1 (0.5-2.2) | P = 1          |
| Mean age (years)                                                 | 58.5                              | 59.3                              | -             | P = 0.7        |
| Mean age-adjusted CCI at admission ±SD                           | 3.4 ± 2.5                         | 3.7 ± 3.3                         | -             | P = 0.9        |
| <b>Comorbidities</b>                                             |                                   |                                   |               |                |
| No comorbidities                                                 | 5 (29.4%)                         | 5 (29.4%)                         | 1.0 (0.4-2.1) | P = 1          |
| Cardiovascular disease                                           | 5 (29.4%)                         | 8 (47.0%)                         | 1.4 (0.6-3.2) | P = 0.4        |
| Heart failure                                                    | 0 (0%)                            | 4 (23.5%)                         | -             | P = 0.1        |
| Diabetes                                                         | 3 (17.6%)                         | 4 (23.5%)                         | 1.2 (0.4-3.0) | P = 1          |
| Renal failure                                                    | 3 (17.6%)                         | 0 (0%)                            | -             | P = 0.2        |
| Inflammatory bowel disease                                       | 2 (11.7%)                         | 0 (0%)                            | -             | P = 0.4        |
| Chronic liver failure                                            | 2 (11.7%)                         | 0 (0%)                            | -             | P = 0.4        |
| Neurological disease                                             | 2 (11.7%)                         | 2 (11.7%)                         | 1 (0.3-2.8)   | P = 1          |
| Vasculitis                                                       | 1 (5.8%)                          | 1 (5.8%)                          | 1 (0.2-4.1)   | P = 1          |
| COPD                                                             | 6 (35.2 %)                        | 2 (11.7%)                         | 0.5 (0.3-1.0) | P = 0.2        |
| Solid cancer                                                     | 2 (11.7%)                         | 1 (5.8%)                          | 0.7 (0.3-1.7) | P = 1          |
| Blood cancer                                                     | 1 (5.8%)                          | 2 (11.7%)                         | 1.5 (0.3-7.9) | P = 1          |
| Transplant, immunodeficiency, immunosuppression                  | 3 (17.6%)                         | 4 (23.5%)                         | 1.2 (0.4-3.0) | P = 1          |
| Other concomitant infections                                     | 6 (35.2 %)                        | 7 (41.1%)                         | 1.1 (0.5-2.3) | P = 1          |
| <i>Laboratory findings before CDI diagnosis</i>                  |                                   |                                   |               |                |
| Basal Albumin (g/dL ±SD)                                         | 3.3 ± 0.5                         | 3.9 ± 0.6                         | -             | P = 0.02       |
| Basal Creatinine (mg/dL ±SD)                                     | 0.7 ± 0.2                         | 0.7 ± 0.2                         | -             | P = 0.4        |
| <i>Laboratory findings at T0</i>                                 |                                   |                                   |               |                |
| White blood cell peripheral count (10 <sup>3</sup> cells/μL ±SD) | 11.38 ± 5.71                      | 11.38 ± 6.47                      | -             | P = 0.8        |
| Neutrophils peripheral count (10 <sup>3</sup> cells/μL ±SD)      | 8.02 ± 5.33                       | 8.66 ± 5.71                       | -             | P = 0.7        |
| Creatinine (mg/dL ±SD)                                           | 1.0 ± 0.7                         |                                   | -             | P = 0.7        |

|                         |                 |                |               |         |
|-------------------------|-----------------|----------------|---------------|---------|
| Albumin (g/dL $\pm$ SD) | 3.2 $\pm$ 0.5   | 3.5 $\pm$ 0.6  | -             | P = 0.1 |
| TcdB (ng/mL $\pm$ SD)   | 0.15 $\pm$ 0.60 | 0.52 $\pm$ 1.7 | -             | P = 0.4 |
| Severe CDI              | 6 (35.2 %)      | 12 (70.5%)     | 2.0 (1-4.2)   | P= 0.04 |
| Patients outcome        |                 |                |               |         |
| Deceased                | 0 (0%)          | 1 (5.8%)       | -             | P = 1   |
| rCDI                    | 3 (17.6%)       | 2 (11.7%)      | 0.8 (0.3-1.8) | P = 1   |



**Table S5.** Risk factors for detectable level of TcdB toxemia (TcdB > 4 pg/μL) at the CDI onset. RR: risk ratio. CI: confidence interval. SD: standard deviation. CCI: Charlson Co-morbidity index.

|                                                                  | TcdB not detectable at<br>T0 (N = 30) | TcdB > 4 pg/mL<br>at T0 (N = 4) | RR (95% CI)    | Fisher's test* |
|------------------------------------------------------------------|---------------------------------------|---------------------------------|----------------|----------------|
| Female gender                                                    | 15 (50.0%)                            | 2 (50.0%)                       | 1.0 (0.7-1.2)  | P = 1          |
| Mean age (years)                                                 | 59.8                                  | 52.7                            | -              | P = 0.5        |
| Mean age-adjusted CCI at admission ±SD                           | 3.6 ± 2.9                             | 3.0 ± 3.5                       | -              | P = 0.6        |
| <b>Comorbidities</b>                                             |                                       |                                 |                |                |
| No comorbidities                                                 | 8 (26.6%)                             | 2 (50.0%)                       | 2.4 (0.3-14.7) | P = 0.5        |
| Cardiovascular disease                                           | 11 (36.6%)                            | 2 (50.0%)                       | 1.0 (0.8-1.4)  | P = 0.6        |
| Heart failure                                                    | 3 (10.0%)                             | 1 (25.0%)                       | 1.2 (0.6-2.1)  | P = 0.4        |
| Diabetes                                                         | 6 (20.0%)                             | 1 (25.0%)                       | 1.0 (0.7-1.4)  | P = 1          |
| Renal failure                                                    | 3 (10.0%)                             | 0 (0%)                          | -              | P = 1          |
| Inflammatory bowel disease                                       | 2 (6.6%)                              | 0 (0%)                          | -              | P = 1          |
| Chronic liver failure                                            | 2 (6.6%)                              | 0 (0%)                          | -              | P = 1          |
| Neurological disease                                             | 4 (13.3%)                             | 0 (0%)                          | -              | P = 1          |
| Vasculitis                                                       | 2 (6.6%)                              | 0 (0%)                          | -              | P = 1          |
| COPD                                                             | 8 (26.6%)                             | 0 (0%)                          | -              | P = 0.5        |
| Solid cancer                                                     | 3 (10.0%)                             | 0 (0%)                          | -              | P = 1          |
| Blood cancer                                                     | 3 (10.0%)                             | 0 (0%)                          | -              | P = 1          |
| Transplant, immunodeficiency, immunosuppression                  | 7 (23.3%)                             | 0 (0%)                          | -              | P = 0.5        |
| Other concomitant infections                                     | 12 (40.0 %)                           | 1 (25.0%)                       | 0.9 (0.7-1.1)  | P = 1          |
| <i>Laboratory findings before CDI diagnosis</i>                  |                                       |                                 |                |                |
| Basal Albumin (g/dL ±SD)                                         | 3.6 ± 0.6                             | 3.2 ± 0.3                       | -              | P = 0.3        |
| Basal Creatinine (mg/dL ±SD)                                     | 0.7 ± 0.2                             | 0.6 ± 0.1                       | -              | P = 0.2        |
| <i>Laboratory findings at T0</i>                                 |                                       |                                 |                |                |
| White blood cell peripheral count (10 <sup>3</sup> cells/μL ±SD) | 11.00 ± 5.85                          | 12.65 ± 7.94                    | -              | P = 0.6        |
| Neutrophils peripheral count (10 <sup>3</sup> cells/μL ±SD)      | 8.11 ± 5.29                           | 10.12 ± 7.17                    | -              | P = 0.4        |
| Creatinine (mg/dL ±SD)                                           | 1.0 ± 0.6                             | 0.8 ± 0.4                       | -              | P = 0.4        |
| Albumin (g/dL ±SD)                                               | 3.4 ± 0.5                             | 3.2 ± 0.6                       | -              | P = 0.5        |
| TcdA (ng/mL ±SD)                                                 | 4.68 ± 4.84                           | 4.09 ± 5.16                     | -              | P = 0.8        |

---

|                  |            |           |               |         |
|------------------|------------|-----------|---------------|---------|
| Severe CDI       | 16 (53.3%) | 2 (50.0%) | 0.9 (0.7-1.2) | P= 1    |
| Patients outcome |            |           |               |         |
| Deceased         | 1 (3.3%)   | 0 (0%)    | -             | P = 1   |
| rCDI             | 4 (13.3%)  | 1 (25.0%) | 1.1 (0.7-1.7) | P = 0.4 |

---
